# Supplementary material
Source: PubMed Central journal article supplement (PMC3419853)
Supplement: Supp_Fig4.pdf [file Supp_Fig4.pdf]

**SUPPLEMENTARY FIG. S4.** Vascular morphogenesis with ASCs from multiple donors. ASCs from four additional donors formed similar CD31+ /vWF + vessels surrounded by  $\alpha$ SMA+ cells after 14 days. Scale bar=100  $\mu$ m.  $\alpha$ SMA,  $\alpha$ -smooth muscle actin.
