# Supplementary material
Source: PubMed Central journal article supplement (PMC3419853)
Supplement: Supp_Fig5.pdf [file Supp_Fig5.pdf]

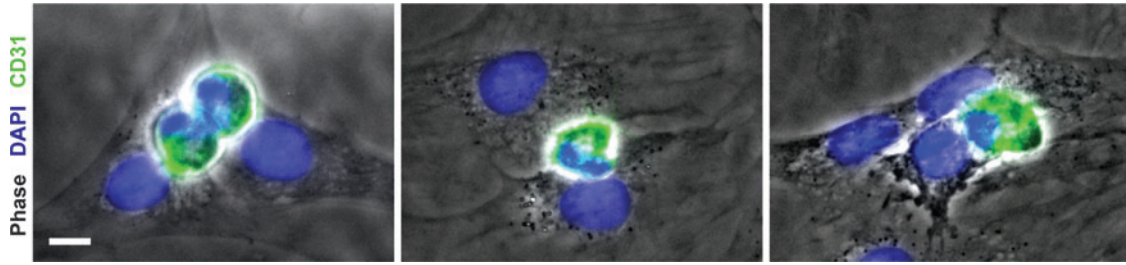

**SUPPLEMENTARY FIG. S5.** Attachment of CD31+ cells. Four hours postseeding, all CD31+ cells were directly contacting other cells, facilitated by the high seeding density. Scale bar=10  $\mu$ m.
