# Supplementary material
Source: PubMed Central journal article supplement (PMC3419853)
Supplement: Supp_Table.pdf [file Supp_Table.pdf]

SUPPLEMENTARY TABLE 1. PRIMER SEQUENCES FOR  
QUANTITATIVE POLYMERASE CHAIN REACTION

| <i>Gene name</i>        | <i>Primer sequence (5' - 3')</i>                                                |
|-------------------------|---------------------------------------------------------------------------------|
| $\alpha$ SMA            | <i>Forward: CGGACCTTTGGCTTGGCTT</i><br><i>Reverse: TGGGGTGCGGACAGGAATT</i>      |
| $\beta$ -Actin          | <i>Forward: AGTTGCGTTACACCCTTTCTTG</i><br><i>Reverse: TCACCTTCACCGTTCCAGTTT</i> |
| CD31<br>(PECAM-1)       | <i>Forward: TCAGCAGCATCGTGGTCAAC</i><br><i>Reverse: TGGAGCAGGACAGGTTCACT</i>    |
| FGFR-1                  | <i>Forward: CCTCTATGCTTGCCTAACCA</i><br><i>Reverse: CATCATCATCATCATCCTCCGA</i>  |
| GAPDH                   | <i>Forward: CACCCACTCCTCCACCTTGA</i><br><i>Reverse: TCCACCACCTGTTGCTGTAG</i>    |
| PDGF-B                  | <i>Forward: GTTGAGGTGGCTGTAGATGGT</i><br><i>Reverse: AGGGTGGAGGTAGAGAGATGAA</i> |
| VE-Cadherin<br>(CD144)  | <i>Forward: ATGGACCCTGATGCGGCTA</i><br><i>Reverse: TGTGACTCGGAAGAACTGGC</i>     |
| VEGF-A                  | <i>Forward: GCCTTGCCTTGCTGCTCTA</i><br><i>Reverse: GATTCTGCCCTCCTCCTTCTG</i>    |
| VEGFR-2<br>(Flk-1, KDR) | <i>Forward: AGTCTGTGGCATCTGAAGGC</i><br><i>Reverse: ACGGTGGTGTCTGTGTCATC</i>    |
| vWF                     | <i>Forward: GGGCTGTGTGGCAACTTTAAC</i><br><i>Reverse: ATAAGGGTCCGAGGTCAAGGT</i>  |
